# Supplementary material for: Improvements in Fatigue in 1536 Patients with Rheumatoid Arthritis and Correlation with Other Treatment Outcomes: A Post Hoc Analysis of Three Randomized Controlled Trials of Abatacept
Source: Springer Nature journal article supplement (doi:10.1007/s40744-017-0054-6), 2017-03-01
Supplement: MOESM1 [file 24439268]

## Supplementary figure

Supplementary Figure 1. Cross-tabulation of attaining fatigue and pain changes  $\geq$  MCID at Day 169 in AGREE, AIM, and ATTAIN.

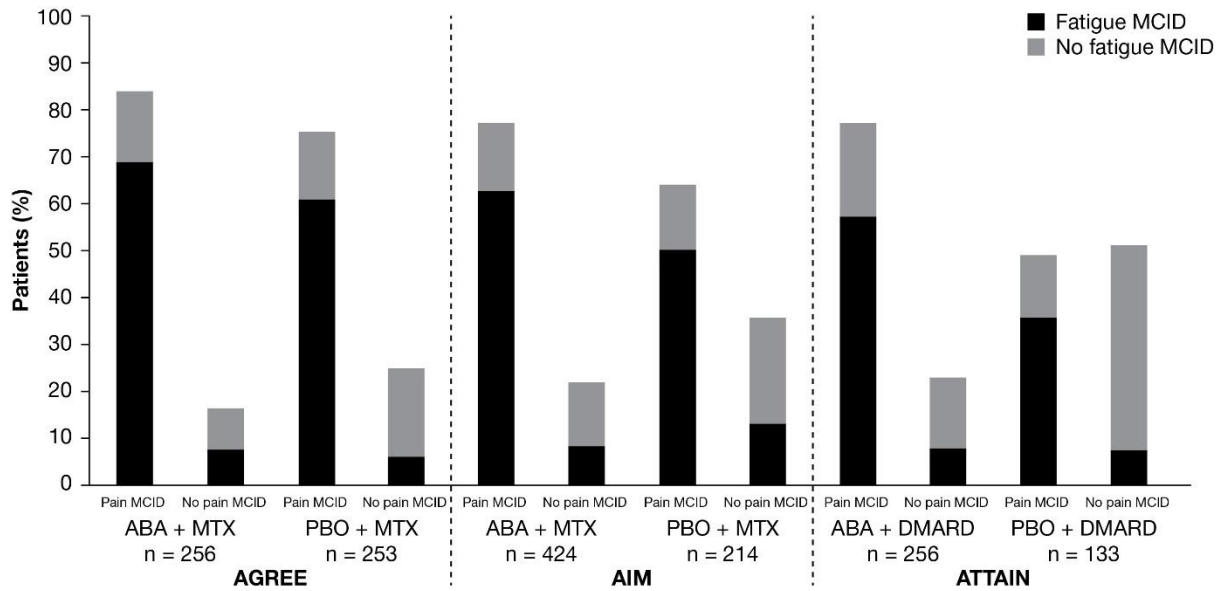

MCID for fatigue was defined as fatigue score change from baseline  $\leq -10$  mm. MCID for pain was defined as pain score change from baseline  $\leq -10$  mm. ABA: abatacept; DMARD: disease-modifying antirheumatic drug; MCID: minimum clinically important difference; MTX: methotrexate; PBO: placebo.
